# Supplementary material
Source: PubMed Central journal article supplement (PMC5670014)
Supplement: NIHMS896486-supplement-Table_S1.pdf [file NIHMS896486-supplement-Table_S1.pdf]

| Name                                           | Cell viability (% of u SD) |       |
|------------------------------------------------|----------------------------|-------|
| <b>NVP-BGT226</b>                              | 40.28160338                | 0.70  |
| <b>IMD 0354</b>                                | 41.26050633                | 1.10  |
| <b>CCT137690</b>                               | 43.37987654                | 0.75  |
| <b>PF-03814735</b>                             | 46.66827957                | 0.26  |
| <b>SNS-314</b>                                 | 55.52632911                | 0.74  |
| <b>ZM-447439</b>                               | 77.61111111                | 1.25  |
| <b>CEP33779</b>                                | 78.44247312                | 1.96  |
| <b>Lapatinib Ditosylate (Tykerb)</b>           | 78.55271605                | 1.01  |
| <b>CCT128930</b>                               | 78.7137037                 | 0.44  |
| <b>Sorafenib (Nexavar)</b>                     | 78.72701149                | 7.72  |
| <b>WP1066</b>                                  | 79.19516129                | 2.82  |
| <b>Golvatinib (E7050)</b>                      | 79.31344086                | 1.67  |
| <b>Torin 2</b>                                 | 80.87258065                | 0.64  |
| <b>WAY-600</b>                                 | 80.87419753                | 2.61  |
| <b>LDN193189</b>                               | 81.13345679                | 3.21  |
| <b>Apatinib (YN968D1)</b>                      | 81.31814815                | 1.48  |
| <b>Amuvatinib (MP-470)</b>                     | 81.44011494                | 13.48 |
| <b>BYL719</b>                                  | 81.55987654                | 10.95 |
| <b>WP1130</b>                                  | 81.67666667                | 0.69  |
| <b>Staurosporine</b>                           | 81.75691358                | 3.48  |
| <b>MK-2461</b>                                 | 81.82956989                | 1.54  |
| <b>AZD8055</b>                                 | 82.05952381                | 5.52  |
| <b>WHI-P154</b>                                | 82.06034483                | 2.42  |
| <b>AZD4547</b>                                 | 82.61451613                | 7.22  |
| <b>Desmethyl Erlotinib (CP-473420)</b>         | 82.66954023                | 0.83  |
| <b>Tivozanib (AV-951)</b>                      | 83.13095238                | 12.71 |
| <b>HMN-214</b>                                 | 83.33333333                | 4.64  |
| <b>A-769662</b>                                | 83.44444444                | 3.22  |
| <b>Indirubin</b>                               | 83.63333333                | 1.31  |
| <b>Tofacitinib citrate (CP-690550 citrate)</b> | 83.65864198                | 1.36  |
| <b>TAK-285</b>                                 | 83.81896552                | 3.51  |
| <b>Raf265 derivative</b>                       | 83.90632184                | 2.39  |
| <b>A-674563</b>                                | 84.1362069                 | 3.91  |
| <b>AZD2014</b>                                 | 84.58908046                | 1.81  |
| <b>LY2784544</b>                               | 84.82142857                | 2.74  |
| <b>GSK1838705A</b>                             | 84.93390805                | 16.93 |
| <b>GSK1120212 (Trametinib)</b>                 | 85.30580247                | 4.11  |
| <b>ARRY334543</b>                              | 85.49712644                | 2.45  |
| <b>PP-121</b>                                  | 85.50333333                | 2.97  |
| <b>NVP-TAE226</b>                              | 85.68978495                | 4.00  |
| <b>R935788 (Fostamatinib disodium, R78)</b>    | 86.35555556                | 2.16  |
| <b>GSK461364</b>                               | 86.65752688                | 0.97  |
| <b>Dabrafenib (GSK2118436)</b>                 | 86.92241379                | 1.38  |
| <b>ENMD-2076</b>                               | 87.40563218                | 3.48  |
| <b>TAK-901</b>                                 | 87.44655172                | 3.68  |
| <b>BMS 794833</b>                              | 87.60259259                | 2.22  |
| <b>CHIR-98014</b>                              | 88.10172414                | 0.54  |
| <b>Mubritinib (TAK 165)</b>                    | 88.1362069                 | 2.97  |
| <b>BMS-599626 (AC480)</b>                      | 88.48619048                | 0.84  |
| <b>TPCA-1</b>                                  | 88.9454023                 | 1.97  |
| <b>Palomid 529</b>                             | 89.19367816                | 3.60  |
| <b>GSK2126458</b>                              | 89.24892473                | 14.48 |

|                                   |             |      |
|-----------------------------------|-------------|------|
| <b>GSK1070916</b>                 | 89.64444444 | 1.54 |
| <b>PIK-90</b>                     | 89.75691358 | 5.65 |
| <b>MGCD-265</b>                   | 90.02380952 | 0.13 |
| <b>Dovitinib (TKI-258)</b>        | 90.1052381  | 0.85 |
| <b>Crenolanib (CP-868596)</b>     | 90.19367816 | 5.61 |
| <b>YM201636</b>                   | 90.51567901 | 1.28 |
| <b>Hesperadin</b>                 | 90.6391358  | 4.20 |
| <b>PHA-767491</b>                 | 90.74444444 | 1.20 |
| <b>3-Methyladenine</b>            | 90.80679012 | 1.07 |
| <b>KW 2449</b>                    | 91.07790123 | 1.53 |
| <b>Pelitinib (EKB-569)</b>        | 91.11827586 | 2.17 |
| <b>AZD8330</b>                    | 91.23817204 | 6.49 |
| <b>WZ4002</b>                     | 91.30580247 | 3.68 |
| <b>Flavopiridol hydrochloride</b> | 91.41691358 | 3.90 |
| <b>PHA-848125</b>                 | 91.81111111 | 5.10 |
| <b>PF-05212384 (PKI-587)</b>      | 92.56149425 | 0.75 |
| <b>GSK1059615</b>                 | 92.73809524 | 1.43 |
| <b>SB 525334</b>                  | 92.8062963  | 2.24 |
| <b>Quizartinib (AC220)</b>        | 92.8737037  | 2.84 |
| <b>PCI-32765 (Ibrutinib)</b>      | 93.01111111 | 2.31 |
| <b>BMS 777607</b>                 | 93.07688172 | 2.85 |
| <b>PIK-93</b>                     | 93.50666667 | 1.72 |
| <b>PP242</b>                      | 93.63045977 | 1.84 |
| <b>PKI-402</b>                    | 93.7008642  | 0.83 |
| <b>AZ628</b>                      | 93.76308642 | 1.52 |
| <b>TAK-733</b>                    | 93.77988506 | 0.48 |
| <b>BX-795</b>                     | 93.84       | 4.08 |
| <b>AT7519</b>                     | 93.86904762 | 1.75 |
| <b>BKM120 (NVP-BKM120)</b>        | 93.8737037  | 1.84 |
| <b>Ruxolitinib (INCB018424)</b>   | 93.92       | 0.93 |
| <b>Dinaciclib (SCH727965)</b>     | 93.94259259 | 2.57 |
| <b>TG101348 (SAR302503)</b>       | 94.02234568 | 2.38 |
| <b>Masitinib (AB1010)</b>         | 94.02305556 | 1.75 |
| <b>TWS119</b>                     | 94.08358025 | 3.48 |
| <b>LY2228820</b>                  | 94.14126437 | 1.69 |
| <b>Tideglusib</b>                 | 94.33494624 | 0.44 |
| <b>CP 673451</b>                  | 94.38654321 | 0.45 |
| <b>MK-5108 (VX-689)</b>           | 94.44247312 | 1.25 |
| <b>GDC-0980 (RG7422)</b>          | 94.47777778 | 2.98 |
| <b>TG100-115</b>                  | 94.51       | 2.18 |
| <b>CP-724714</b>                  | 94.52057471 | 2.82 |
| <b>PIK-75</b>                     | 94.66666667 | 0.40 |
| <b>AEE788 (NVP-AEE788)</b>        | 94.72619048 | 0.94 |
| <b>Afatinib (BIBW2992)</b>        | 94.77827586 | 1.17 |
| <b>WZ3146</b>                     | 94.83098765 | 1.63 |
| <b>CHIR-124</b>                   | 94.84885057 | 0.91 |
| <b>Tie2 kinase inhibitor</b>      | 94.88604938 | 0.67 |
| <b>CAL-101 (GS-1101)</b>          | 94.88888889 | 0.53 |
| <b>INK 128</b>                    | 95.0537037  | 0.77 |
| <b>Vemurafenib (PLX4032)</b>      | 95.13296296 | 2.40 |
| <b>AZD5438</b>                    | 95.13296296 | 1.31 |
| <b>Baricitinib (LY3009104)</b>    | 95.15215054 | 2.54 |
| <b>Wortmannin</b>                 | 95.32471264 | 0.68 |

|                                                 |             |      |
|-------------------------------------------------|-------------|------|
| <b>TG101209</b>                                 | 95.33049383 | 1.17 |
| <b>BIRB 796 (Doramapimod)</b>                   | 95.41666667 | 4.23 |
| <b>CYC116</b>                                   | 95.54761905 | 0.57 |
| <b>Dovitinib Dilactic acid (TKI258 Dilactic</b> | 95.79444444 | 0.58 |
| <b>ZM 336372</b>                                | 95.87419753 | 0.44 |
| <b>ARQ 197 (Tivantinib)</b>                     | 95.93444444 | 1.49 |
| <b>SP600125</b>                                 | 96.06666667 | 2.55 |
| <b>ON-01910</b>                                 | 96.07123457 | 1.87 |
| <b>Crizotinib (PF-02341066)</b>                 | 96.20214286 | 1.30 |
| <b>PF-04691502</b>                              | 96.27888889 | 1.34 |
| <b>Ki8751</b>                                   | 96.44       | 0.51 |
| <b>PD318088</b>                                 | 96.44011494 | 1.20 |
| <b>OSI-420 (Desmethyl Erlotinib)</b>            | 96.61444444 | 1.36 |
| <b>OSI-930</b>                                  | 96.66666667 | 0.91 |
| <b>BI6727 (Volasertib)</b>                      | 96.73390805 | 2.23 |
| <b>NVP-BHG712</b>                               | 96.98530864 | 1.49 |
| <b>Neratinib (HKI-272)</b>                      | 97.03781609 | 0.54 |
| <b>NVP-BSK805</b>                               | 97.41740741 | 3.74 |
| <b>PF-00562271</b>                              | 97.62728395 | 1.19 |
| <b>WYE-354</b>                                  | 97.64285714 | 2.84 |
| <b>AG-1478 (Tyrphostin AG-1478)</b>             | 97.65666667 | 3.07 |
| <b>OSU-03012</b>                                | 97.66888889 | 2.15 |
| <b>E7080 (Lenvatinib)</b>                       | 97.79643678 | 1.29 |
| <b>Thiazovivin</b>                              | 97.81197531 | 1.66 |
| <b>Phenformin hydrochloride</b>                 | 98.02126437 | 1.79 |
| <b>PD98059</b>                                  | 98.07123457 | 1.73 |
| <b>Ku-0063794</b>                               | 98.29333333 | 2.09 |
| <b>AZD8931</b>                                  | 98.38666667 | 1.29 |
| <b>Regorafenib (BAY 73-4506)</b>                | 98.61333333 | 1.22 |
| <b>AMG 900</b>                                  | 98.73839506 | 1.55 |
| <b>Torin 1</b>                                  | 98.80679012 | 2.75 |
| <b>INCB28060</b>                                | 98.86851852 | 1.71 |
| <b>Cyt387</b>                                   | 98.89888889 | 0.98 |
| <b>PIK-293</b>                                  | 98.97777778 | 4.15 |
| <b>Linsitinib (OSI-906)</b>                     | 99.09571429 | 7.12 |
| <b>SAR131675</b>                                | 99.1154321  | 0.40 |
| <b>Telatinib (BAY 57-9352)</b>                  | 99.47888889 | 0.23 |
| <b>AMG458</b>                                   | 99.68901235 | 0.78 |
| <b>PHA-680632</b>                               | 100.2261905 | 2.57 |
| <b>BMS-265246</b>                               | 100.28      | 0.54 |
| <b>Bosutinib (SKI-606)</b>                      | 100.284023  | 1.59 |
| <b>AZD7762</b>                                  | 100.4401149 | 1.40 |
| <b>R406(free base)</b>                          | 100.5223457 | 2.78 |
| <b>KX2-391</b>                                  | 100.5677778 | 0.61 |
| <b>AT9283</b>                                   | 100.6004762 | 6.07 |
| <b>Tofacitinib (CP-690550, Tasocitinib)</b>     | 100.6092593 | 1.38 |
| <b>AS-605240</b>                                | 100.7849425 | 1.00 |
| <b>A66</b>                                      | 100.8366667 | 3.78 |
| <b>SB 415286</b>                                | 101.5431034 | 1.43 |
| <b>AS703026</b>                                 | 101.7939506 | 2.04 |
| <b>Ponatinib (AP24534)</b>                      | 101.8133333 | 0.35 |
| <b>DCC-2036 (Rebastinib)</b>                    | 101.8373563 | 0.72 |
| <b>PH-797804</b>                                | 101.9333333 | 0.61 |

|                                           |             |      |
|-------------------------------------------|-------------|------|
| <b>TGX-221</b>                            | 102.1519753 | 0.69 |
| <b>cx-4945 (Silmitasertib)</b>            | 102.5650617 | 3.01 |
| <b>BI 2536</b>                            | 102.6545238 | 0.99 |
| <b>XL765</b>                              | 102.9914815 | 1.72 |
| <b>PD173074</b>                           | 103.1071429 | 1.18 |
| <b>BX-912</b>                             | 103.2332184 | 0.87 |
| <b>Dacomitinib (PF299804,PF-00299804)</b> | 103.3555556 | 2.49 |
| <b>R406</b>                               | 103.5844828 | 0.34 |
| <b>PIK-294</b>                            | 103.69      | 5.68 |
| <b>OSI-027</b>                            | 103.8       | 4.87 |
| <b>JNJ-7706621</b>                        | 103.855679  | 0.03 |
| <b>Tyrphostin AG 879 (AG 879)</b>         | 103.8685185 | 0.73 |
| <b>NVP-BVU972</b>                         | 103.8994253 | 0.56 |
| <b>R788 (Fostamatinib)</b>                | 104.1455556 | 0.97 |
| <b>Imatinib Mesylate</b>                  | 104.162381  | 0.79 |
| <b>AS-604850</b>                          | 104.4455556 | 0.86 |
| <b>WYE-125132</b>                         | 104.49      | 0.38 |
| <b>NH125</b>                              | 104.7242857 | 0.72 |
| <b>Arry-380</b>                           | 104.9222222 | 0.95 |
| <b>Foretinib (GSK1363089, XL880)</b>      | 104.9966667 | 0.59 |
| <b>WYE-687</b>                            | 105.2233333 | 0.78 |
| <b>BS-181 HCl</b>                         | 105.7075309 | 1.41 |
| <b>LY2603618 (IC-83)</b>                  | 105.7344444 | 0.09 |
| <b>PHA-793887</b>                         | 105.9230864 | 0.74 |
| <b>KU-60019</b>                           | 105.9667901 | 5.66 |
| <b>GDC-0068</b>                           | 105.9798851 | 0.57 |
| <b>Aurora A Inhibitor I</b>               | 106.1190476 | 0.23 |
| <b>BGJ398 (NVP-BGJ398)</b>                | 106.17      | 0.42 |
| <b>TAE684 (NVP-TAE684)</b>                | 106.2854762 | 0.26 |
| <b>Enzastaurin (LY317615)</b>             | 106.4766667 | 0.41 |
| <b>Cediranib (AZD2171)</b>                | 106.4861905 | 0.41 |
| <b>NU7441(KU-57788)</b>                   | 106.6020988 | 0.35 |
| <b>Vandetanib (Zactima)</b>               | 106.6307143 | 5.20 |
| <b>CAY10505</b>                           | 106.6344444 | 0.20 |
| <b>AZ 960</b>                             | 106.8677778 | 0.78 |
| <b>SB590885</b>                           | 106.8860494 | 0.87 |
| <b>AST-1306</b>                           | 107.0341975 | 0.77 |
| <b>Axitinib</b>                           | 107.1719048 | 0.64 |
| <b>IC-87114</b>                           | 107.24      | 1.00 |
| <b>Rapamycin (Sirolimus)</b>              | 107.3338095 | 1.50 |
| <b>CI-1033 (Canertinib)</b>               | 107.3841667 | 1.98 |
| <b>KRN 633</b>                            | 107.4539506 | 2.10 |
| <b>GSK690693</b>                          | 108.4480952 | 0.74 |
| <b>AT7867</b>                             | 108.56      | 2.16 |
| <b>Piceatannol</b>                        | 108.658642  | 0.77 |
| <b>CCT129202</b>                          | 109.0655556 | 0.49 |
| <b>PHT-427</b>                            | 109.207037  | 0.46 |
| <b>Sotrastaurin (AEB071)</b>              | 109.2265432 | 0.47 |
| <b>AS-252424</b>                          | 109.2445679 | 0.41 |
| <b>Gefitinib (Iressa)</b>                 | 109.5311494 | 0.57 |
| <b>WZ8040</b>                             | 109.67      | 3.91 |
| <b>PHA-665752</b>                         | 110.1001149 | 0.52 |
| <b>AMG-208</b>                            | 110.5895402 | 1.37 |

|                                            |             |      |
|--------------------------------------------|-------------|------|
| <b>NVP-ADW742</b>                          | 111.0426437 | 1.39 |
| <b>MK-2206 dihydrochloride</b>             | 111.1562585 | 0.62 |
| <b>PF-04217903</b>                         | 111.1562585 | 0.50 |
| <b>SGX-523</b>                             | 111.162381  | 0.50 |
| <b>Linifanib (ABT-869)</b>                 | 111.7528571 | 1.09 |
| <b>Pazopanib HCl</b>                       | 111.8501361 | 1.09 |
| <b>Nilotinib (AMN-107)</b>                 | 113.4759864 | 1.32 |
| <b>Brivanib alaninate (BMS-582664)</b>     | 113.9605556 | 0.58 |
| <b>Deforolimus (Ridaforolimus)</b>         | 114.1307143 | 5.24 |
| <b>GDC-0879</b>                            | 114.6766667 | 0.84 |
| <b>VX-680 (MK-0457, Tozasertib)</b>        | 114.9851724 | 1.72 |
| <b>Imatinib (Gleevec)</b>                  | 115.1788889 | 1.03 |
| <b>LY294002</b>                            | 115.5230556 | 1.59 |
| <b>GDC-0941</b>                            | 115.6052381 | 2.46 |
| <b>AG-1024</b>                             | 117.2102299 | 0.78 |
| <b>PI-103</b>                              | 117.5943678 | 1.71 |
| <b>Roscovitine (Seliciclib, CYC202)</b>    | 117.6173563 | 0.92 |
| <b>TSU-68</b>                              | 117.7734483 | 1.13 |
| <b>BEZ235 (NVP-BEZ235)</b>                 | 118.0202041 | 1.55 |
| <b>PD153035 HCl</b>                        | 119.0235714 | 0.51 |
| <b>ZSTK474</b>                             | 119.3529885 | 0.43 |
| <b>Erlotinib HCl</b>                       | 120.2437931 | 0.85 |
| <b>Barasertib (AZD1152-HQPA)</b>           | 120.47      | 2.34 |
| <b>SB 203580</b>                           | 120.4952778 | 0.93 |
| <b>Vatalanib dihydrochloride (PTK787)</b>  | 120.7616667 | 1.09 |
| <b>VX-702</b>                              | 121.0166667 | 0.56 |
| <b>PD 0332991 (Palbociclib) HCl</b>        | 121.7522222 | 1.88 |
| <b>GSK1904529A</b>                         | 121.8563889 | 1.47 |
| <b>SNS-032 (BMS-387032)</b>                | 121.9181633 | 0.18 |
| <b>Saracatinib (AZD0530)</b>               | 122.0716667 | 1.05 |
| <b>Motesanib Diphosphate</b>               | 122.6411111 | 2.51 |
| <b>Dasatinib (BMS-354825)</b>              | 122.7072789 | 4.89 |
| <b>XL-184 free base (Cabozantinib)</b>     | 122.9759524 | 1.67 |
| <b>Y-27632 2HCl</b>                        | 123.1748276 | 2.69 |
| <b>Quercetin (Sophoretin)</b>              | 123.89      | 0.96 |
| <b>Brivanib (BMS-540215)</b>               | 124.1403448 | 0.62 |
| <b>SB 202190</b>                           | 124.1619444 | 1.19 |
| <b>Tandutinib (MLN518)</b>                 | 124.1698639 | 0.88 |
| <b>Triciribine (Triciribine phosphate)</b> | 124.4555782 | 0.30 |
| <b>XL147</b>                               | 124.4878571 | 1.97 |
| <b>BIX 02188</b>                           | 125.1466667 | 3.73 |
| <b>JNJ-38877605</b>                        | 125.3008333 | 0.22 |
| <b>SB 216763</b>                           | 127.5338095 | 0.34 |
| <b>SU11274</b>                             | 127.5354762 | 1.07 |
| <b>Everolimus (RAD001)</b>                 | 128.0886207 | 1.19 |
| <b>PLX-4720</b>                            | 128.7080952 | 0.56 |
| <b>PD0325901</b>                           | 130.2319048 | 0.57 |
| <b>Temsirolimus (Torisel)</b>              | 130.7412925 | 0.49 |
| <b>BIBF1120 (Vargatef)</b>                 | 130.8152381 | 0.96 |
| <b>AZD6244 (Selumetinib)</b>               | 132.339932  | 0.38 |
| <b>MLN8054</b>                             | 132.7914286 | 2.34 |
| <b>Danusertib (PHA-739358)</b>             | 133.1154422 | 0.44 |
| <b>U0126-EtOH</b>                          | 133.6403448 | 1.32 |

|                                  |             |      |
|----------------------------------|-------------|------|
| <b>SB 431542</b>                 | 136.7072789 | 1.57 |
| <b>Semaxanib (SU5416)</b>        | 137.6216049 | 2.25 |
| <b>BIX 02189</b>                 | 137.68      | 1.23 |
| <b>CI-1040 (PD184352)</b>        | 139.4691837 | 1.03 |
| <b>Sunitinib Malate (Sutent)</b> | 147.3008333 | 0.43 |
| <b>KU-55933</b>                  | 149.0925    | 0.18 |
| <b>AG-490</b>                    | 160.7244444 | 2.24 |
| <b>CH5424802</b>                 | 177.3017241 | 0.99 |
| <b>TG 100713</b>                 | 229.8534483 | 0.82 |

| No. | Name              | %     | SD%  |
|-----|-------------------|-------|------|
|     | <b>Erastin</b>    | 74.29 | 1.43 |
| 14  | <b>Sorafenil</b>  | 31.70 | 2.25 |
| 61  | <b>Afatinib (</b> | 32.61 | 0.56 |
| 57  | <b>Vatalanib</b>  | 33.62 | 0.32 |
| 73  | <b>Y-27632 (</b>  | 34.07 | 0.45 |
| 62  | <b>Erlotinib</b>  | 34.17 | 0.41 |
| 69  | <b>Roscovit</b>   | 34.29 | 1.51 |
| 60  | <b>PLX-4720</b>   | 34.39 | 0.85 |
| 28  | <b>OSU-030</b>    | 35.13 | 0.35 |
| 47  | <b>MLN8054</b>    | 35.60 | 0.77 |
| 22  | <b>CI-1033 (</b>  | 36.09 | 0.14 |
| 65  | <b>Brivanib</b>   | 36.45 | 1.65 |
| 46  | <b>PD153035</b>   | 36.58 | 0.09 |
| 74  | <b>ZSTK474</b>    | 36.79 | 0.52 |
| 53  | <b>PD032590</b>   | 36.93 | 0.65 |
| 52  | <b>Deforolin</b>  | 36.96 | 0.47 |
| 49  | <b>XL147</b>      | 37.19 | 1.55 |
| 70  | <b>Bosutinil</b>  | 38.01 | 0.06 |
| 67  | <b>Foretinib</b>  | 38.40 | 1.35 |
| 32  | <b>CI-1040 (</b>  | 38.46 | 0.33 |
| 68  | <b>Everolim</b>   | 38.60 | 1.03 |
| 36  | <b>MK-2206</b>    | 38.63 | 0.58 |
| 18  | <b>LY294002</b>   | 39.06 | 0.67 |
| 31  | <b>AZD6244</b>    | 39.29 | 0.09 |
| 38  | <b>Danuser</b>    | 39.39 | 0.41 |
| 19  | <b>JNJ-3887</b>   | 39.45 | 0.24 |
| 55  | <b>Crizotinil</b> | 39.52 | 0.30 |
| 51  | <b>BIBF1120</b>   | 39.82 | 2.08 |
| 13  | <b>Lapatinib</b>  | 39.90 | 2.45 |
| 20  | <b>Brivanib</b>   | 40.02 | 0.68 |
| 72  | <b>PI-103</b>     | 40.17 | 0.42 |
| 58  | <b>BI 2536</b>    | 40.21 | 0.64 |
| 43  | <b>Pazopani</b>   | 40.23 | 0.86 |
| 50  | <b>Baraserti</b>  | 40.46 | 1.02 |
| 71  | <b>Gefitinib</b>  | 41.09 | 1.95 |
| 34  | <b>Tandutin</b>   | 41.38 | 0.78 |
| 17  | <b>KU-55933</b>   | 41.76 | 0.72 |
| 37  | <b>PF-04217</b>   | 41.93 | 0.60 |
| 44  | <b>Temsirol</b>   | 42.00 | 0.24 |
| 33  | <b>Nilotinib</b>  | 42.02 | 0.29 |
| 25  | <b>Masitinib</b>  | 42.62 | 0.62 |
| 59  | <b>XL-184 fr</b>  | 42.74 | 0.97 |
| 42  | <b>Dasatinil</b>  | 42.79 | 0.31 |
| 40  | <b>SNS-032</b>    | 43.62 | 0.48 |
| 39  | <b>Triciribin</b> | 43.93 | 0.55 |
| 48  | <b>TAE684 (</b>   | 44.03 | 1.32 |
| 16  | <b>SB 20358</b>   | 45.40 | 1.02 |
| 63  | <b>VX-680 (</b>   | 46.17 | 0.97 |
| 54  | <b>Vandetan</b>   | 46.26 | 0.78 |
| 75  | <b>NVP-ADV</b>    | 46.51 | 1.17 |
| 35  | <b>GDC-094</b>    | 46.65 | 0.33 |
| 41  | <b>BEZ235 (</b>   | 48.01 | 0.84 |

|     |                    |       |      |
|-----|--------------------|-------|------|
| 21  | <b>Saracatinib</b> | 49.35 | 0.92 |
| 29  | <b>PD 033299</b>   | 49.76 | 0.85 |
| 26  | <b>SB 20219</b>    | 52.26 | 0.48 |
| 78  | <b>MLN8237</b>     | 52.70 | 0.35 |
| 45  | <b>SB 43154</b>    | 53.31 | 2.47 |
| 9   | <b>GSK6906</b>     | 55.41 | 0.25 |
| 79  | <b>SNS-314</b>     | 56.23 | 0.63 |
| 11  | <b>Axitinib</b>    | 56.82 | 0.31 |
| 270 | <b>MK-2461</b>     | 57.20 | 0.16 |
| 15  | <b>BMS-5996</b>    | 58.11 | 3.59 |
| 267 | <b>AZD4547</b>     | 58.41 | 0.46 |
| 273 | <b>IMD 0354</b>    | 58.63 | 0.28 |
| 4   | <b>Rapamycin</b>   | 59.54 | 1.95 |
| 7   | <b>Linsitinib</b>  | 60.10 | 0.27 |
| 12  | <b>Dovitinib</b>   | 60.41 | 0.96 |
| 272 | <b>Tideglusib</b>  | 60.46 | 0.24 |
| 10  | <b>AT9283</b>      | 61.11 | 1.73 |
| 76  | <b>ZM-447433</b>   | 61.61 | 0.36 |
| 77  | <b>SGX-523</b>     | 61.62 | 0.66 |
| 155 | <b>BMS 777603</b>  | 61.65 | 0.30 |
| 208 | <b>CAL-101</b>     | 61.66 | 0.32 |
| 84  | <b>Pelitinib</b>   | 61.76 | 0.31 |
| 89  | <b>Neratinib</b>   | 61.79 | 0.12 |
| 83  | <b>BX-912</b>      | 61.83 | 0.26 |
| 164 | <b>CHIR-124</b>    | 62.02 | 0.44 |
| 212 | <b>PCI-32769</b>   | 62.27 | 0.10 |
| 266 | <b>MK-5108</b>     | 62.77 | 0.78 |
| 8   | <b>GDC-0870</b>    | 62.91 | 2.76 |
| 204 | <b>PH-797801</b>   | 63.09 | 0.27 |
| 210 | <b>OSI-027</b>     | 63.09 | 0.13 |
| 114 | <b>HMN-214</b>     | 63.19 | 0.30 |
| 156 | <b>AZD8330</b>     | 63.19 | 0.21 |
| 87  | <b>AZD7762</b>     | 63.22 | 0.19 |
| 90  | <b>CP-72471</b>    | 63.52 | 0.62 |
| 263 | <b>WP1066</b>      | 63.68 | 0.78 |
| 214 | <b>Dacomitinib</b> | 63.76 | 0.09 |
| 207 | <b>R935788</b>     | 63.79 | 0.43 |
| 213 | <b>A-769662</b>    | 63.81 | 0.35 |
| 3   | <b>Imatinib</b>    | 63.84 | 0.20 |
| 166 | <b>Crenolanib</b>  | 63.92 | 0.80 |
| 88  | <b>PD318089</b>    | 63.95 | 0.15 |
| 27  | <b>GSK1904</b>     | 63.98 | 0.49 |
| 269 | <b>Golvatinib</b>  | 63.99 | 1.06 |
| 215 | <b>PHA-767491</b>  | 64.01 | 0.25 |
| 240 | <b>TPCA-1</b>      | 64.07 | 0.48 |
| 268 | <b>NVP-TAE684</b>  | 64.19 | 1.55 |
| 216 | <b>Arry-380</b>    | 64.21 | 0.25 |
| 217 | <b>PIK-293</b>     | 64.34 | 0.26 |
| 241 | <b>WHI-P154</b>    | 64.34 | 0.69 |
| 56  | <b>SU11274</b>     | 64.43 | 1.16 |
| 116 | <b>AZD8055</b>     | 64.49 | 0.15 |
| 271 | <b>CEP3377</b>     | 64.58 | 0.72 |
| 168 | <b>Raf265</b>      | 64.63 | 0.73 |



|     |                     |       |      |
|-----|---------------------|-------|------|
| 121 | <b>WYE-354</b>      | 64.64 | 0.12 |
| 66  | <b>U0126-Et</b>     | 64.68 | 2.84 |
| 238 | <b>AZD2014</b>      | 64.76 | 0.33 |
| 2   | <b>Cediranil</b>    | 64.86 | 1.24 |
| 93  | <b>AMG-208</b>      | 64.86 | 0.14 |
| 203 | <b>GDC-098</b>      | 64.91 | 0.24 |
| 239 | <b>Dabrafen</b>     | 65.02 | 1.01 |
| 118 | <b>LY278454</b>     | 65.05 | 0.29 |
| 113 | <b>Aurora A</b>     | 65.14 | 0.22 |
| 99  | <b>KW 2449</b>      | 65.15 | 0.10 |
| 265 | <b>Baricitini</b>   | 65.15 | 0.87 |
| 86  | <b>LY222882</b>     | 65.20 | 0.97 |
| 264 | <b>Torin 2</b>      | 65.24 | 1.09 |
| 115 | <b>AT7519</b>       | 65.27 | 0.27 |
| 92  | <b>Amuvatir</b>     | 65.60 | 0.66 |
| 223 | <b>KX2-391</b>      | 65.60 | 0.21 |
| 165 | <b>TAK-901</b>      | 65.61 | 0.31 |
| 122 | <b>MGCD-26</b>      | 65.64 | 0.01 |
| 170 | <b>Palomid 80</b>   | 65.64 | 0.90 |
| 94  | <b>AS-60524</b>     | 65.64 | 0.29 |
| 167 | <b>CHIR-980</b>     | 65.71 | 0.17 |
| 162 | <b>PF-05212</b>     | 65.75 | 0.64 |
| 228 | <b>Telatinib</b>    | 65.79 | 0.83 |
| 120 | <b>Tivozanil</b>    | 65.81 | 0.15 |
| 163 | <b>A-674563</b>     | 65.87 | 0.31 |
| 80  | <b>E7080 (L</b>     | 65.95 | 0.44 |
| 222 | <b>AS-60485</b>     | 66.02 | 0.30 |
| 119 | <b>CYC116</b>       | 66.04 | 0.26 |
| 106 | <b>XL765</b>        | 66.04 | 0.04 |
| 231 | <b>WYE-687</b>      | 66.04 | 0.66 |
| 209 | <b>Indirubin</b>    | 66.09 | 0.54 |
| 221 | <b>WYE-125</b>      | 66.23 | 0.21 |
| 202 | <b>Flavopirin</b>   | 66.25 | 3.39 |
| 205 | <b>GSK1070</b>      | 66.28 | 0.41 |
| 112 | <b>GSK1059</b>      | 66.35 | 0.18 |
| 117 | <b>BIRB 796</b>     | 66.38 | 0.34 |
| 159 | <b>Mubritini</b>    | 66.45 | 0.17 |
| 91  | <b>ENMD-20</b>      | 66.48 | 0.19 |
| 224 | <b>AG-1478</b>      | 66.52 | 0.62 |
| 104 | <b>Staurosporin</b> | 66.57 | 0.12 |
| 1   | <b>Linifanib</b>    | 66.70 | 0.75 |
| 218 | <b>PIK-294</b>      | 66.77 | 0.14 |
| 96  | <b>CCT1292</b>      | 66.85 | 0.53 |
| 196 | <b>NVP-BG1</b>      | 66.89 | 0.33 |
| 160 | <b>BI6727 (V</b>    | 67.10 | 1.07 |
| 111 | <b>PD173074</b>     | 67.11 | 0.02 |
| 245 | <b>Desmethy</b>     | 67.16 | 0.61 |
| 161 | <b>Phenformin</b>   | 67.17 | 0.23 |
| 124 | <b>AEE788 (</b>     | 67.26 | 0.09 |
| 244 | <b>GDC-006</b>      | 67.26 | 0.36 |
| 100 | <b>TGX-221</b>      | 67.27 | 0.33 |
| 195 | <b>PKI-402</b>      | 67.32 | 0.16 |
| 206 | <b>PHA-848</b>      | 67.47 | 0.39 |

|     |                   |       |      |
|-----|-------------------|-------|------|
| 227 | <b>AZ 960</b>     | 67.47 | 0.52 |
| 107 | <b>CP 67345</b>   | 67.53 | 0.04 |
| 180 | <b>LDN1931</b>    | 67.59 | 0.29 |
| 197 | <b>OSI-420 (</b>  | 67.62 | 0.23 |
| 123 | <b>PHA-6801</b>   | 67.88 | 0.34 |
| 191 | <b>A66</b>        | 67.94 | 0.22 |
| 229 | <b>Imatinib (</b> | 67.94 | 0.43 |
| 101 | <b>PIK-90</b>     | 67.96 | 0.59 |
| 232 | <b>CAY1050</b>    | 67.99 | 0.56 |
| 130 | <b>YM20163</b>    | 68.00 | 0.33 |
| 220 | <b>R788 (Fo.</b>  | 68.00 | 0.30 |
| 103 | <b>TG100-11</b>   | 68.09 | 0.23 |
| 253 | <b>Tofacitin</b>  | 68.25 | 0.35 |
| 131 | <b>Vemurafe</b>   | 68.26 | 0.37 |
| 176 | <b>AZ628</b>      | 68.30 | 0.04 |
| 133 | <b>Thiazovin</b>  | 68.41 | 0.31 |
| 194 | <b>PF-03814</b>   | 68.44 | 0.22 |
| 136 | <b>KRN 633</b>    | 68.47 | 0.15 |
| 157 | <b>GSK4613</b>    | 68.48 | 0.68 |
| 184 | <b>ZM 33637</b>   | 68.77 | 0.14 |
| 198 | <b>Apatinib (</b> | 68.78 | 0.35 |
| 171 | <b>TAK-733</b>    | 68.79 | 0.46 |
| 102 | <b>JNJ-7706</b>   | 68.83 | 0.47 |
| 226 | <b>ARQ 197</b>    | 68.97 | 0.56 |
| 98  | <b>KU-60019</b>   | 69.02 | 0.53 |
| 235 | <b>CCT1376</b>    | 69.05 | 1.29 |
| 255 | <b>SAR1316</b>    | 69.06 | 0.20 |
| 105 | <b>SB 52533</b>   | 69.07 | 0.06 |
| 97  | <b>R406(free</b>  | 69.10 | 0.22 |
| 132 | <b>ON-01911</b>   | 69.11 | 0.33 |
| 188 | <b>SB590881</b>   | 69.16 | 0.02 |
| 225 | <b>PF-04691</b>   | 69.17 | 0.50 |
| 250 | <b>Torin 1</b>    | 69.17 | 0.56 |
| 242 | <b>NVP-BVU</b>    | 69.21 | 0.32 |
| 108 | <b>BS-181 H</b>   | 69.21 | 0.21 |
| 135 | <b>Hesperac</b>   | 69.22 | 0.24 |
| 175 | <b>AMG 900</b>    | 69.28 | 0.28 |
| 199 | <b>cx-4945 (</b>  | 69.33 | 0.21 |
| 137 | <b>TWS119</b>     | 69.35 | 0.38 |
| 23  | <b>Motesani</b>   | 69.36 | 2.25 |
| 126 | <b>PHT-427</b>    | 69.46 | 0.76 |
| 186 | <b>AMG458</b>     | 69.48 | 0.21 |
| 182 | <b>PF-00562</b>   | 69.51 | 0.34 |
| 189 | <b>BKM120 (</b>   | 69.53 | 0.24 |
| 134 | <b>PHA-7931</b>   | 69.53 | 0.37 |
| 138 | <b>AST-1306</b>   | 69.63 | 0.10 |
| 200 | <b>PP-121</b>     | 69.80 | 0.02 |
| 181 | <b>CCT1289</b>    | 69.89 | 0.41 |
| 179 | <b>WP1130</b>     | 69.99 | 0.21 |
| 95  | <b>AS703021</b>   | 70.11 | 0.20 |
| 236 | <b>ARRY334</b>    | 70.21 | 1.20 |
| 178 | <b>Cyt387</b>     | 70.25 | 0.79 |
| 211 | <b>GSK2126</b>    | 70.30 | 0.86 |

|     |                   |       |      |
|-----|-------------------|-------|------|
| 183 | <b>WAY-600</b>    | 70.47 | 0.14 |
| 169 | <b>PP242</b>      | 70.48 | 0.45 |
| 172 | <b>DCC-2030</b>   | 70.56 | 0.35 |
| 230 | <b>LY260361</b>   | 70.61 | 0.73 |
| 177 | <b>BMS 7945</b>   | 70.63 | 0.20 |
| 127 | <b>Tie2 kina</b>  | 70.72 | 0.33 |
| 64  | <b>PHA-6657</b>   | 70.72 | 3.93 |
| 192 | <b>GSK1120</b>    | 70.90 | 0.21 |
| 249 | <b>INK 128</b>    | 71.06 | 0.26 |
| 110 | <b>PIK-75</b>     | 71.15 | 0.27 |
| 139 | <b>PD98059</b>    | 71.23 | 0.41 |
| 193 | <b>TG101203</b>   | 71.23 | 0.08 |
| 174 | <b>NVP-BSK</b>    | 71.94 | 0.30 |
| 219 | <b>Quercetin</b>  | 72.07 | 0.24 |
| 252 | <b>3-Methyl</b>   | 72.17 | 0.27 |
| 233 | <b>GSK1838</b>    | 72.23 | 0.36 |
| 187 | <b>NVP-BHG</b>    | 72.31 | 0.20 |
| 201 | <b>NU7441(I</b>   | 72.54 | 0.07 |
| 257 | <b>Dinaciclib</b> | 72.60 | 0.62 |
| 185 | <b>TG101344</b>   | 72.65 | 0.15 |
| 256 | <b>Tofacitin</b>  | 72.67 | 0.92 |
| 190 | <b>AZD5438</b>    | 72.72 | 0.33 |
| 125 | <b>Quizartin</b>  | 72.93 | 0.09 |
| 5   | <b>Enzastau</b>   | 73.10 | 0.86 |
| 262 | <b>Dovitinib</b>  | 73.15 | 0.25 |
| 143 | <b>SP600125</b>   | 73.69 | 0.08 |
| 158 | <b>R406</b>       | 73.86 | 1.14 |
| 248 | <b>INCB2801</b>   | 73.94 | 0.48 |
| 254 | <b>BYL719</b>     | 74.38 | 0.12 |
| 142 | <b>Ki8751</b>     | 74.93 | 0.79 |
| 234 | <b>SB 41528</b>   | 74.95 | 1.01 |
| 128 | <b>BGJ398 (</b>   | 74.99 | 0.17 |
| 144 | <b>PIK-93</b>     | 75.81 | 0.37 |
| 6   | <b>SB 21676</b>   | 75.84 | 2.99 |
| 243 | <b>TAK-285</b>    | 76.21 | 1.01 |
| 141 | <b>IC-87114</b>   | 76.28 | 0.23 |
| 109 | <b>WZ3146</b>     | 76.63 | 0.56 |
| 149 | <b>Regorafe</b>   | 76.68 | 0.54 |
| 140 | <b>OSI-930</b>    | 77.20 | 0.54 |
| 151 | <b>BX-795</b>     | 77.23 | 0.86 |
| 146 | <b>AT7867</b>     | 77.41 | 0.32 |
| 150 | <b>Ku-00637</b>   | 77.47 | 0.43 |
| 148 | <b>AZD8931</b>    | 77.55 | 0.39 |
| 152 | <b>Ruxolitin</b>  | 77.97 | 0.11 |
| 261 | <b>VX-702</b>     | 78.23 | 1.36 |
| 129 | <b>WZ4002</b>     | 78.73 | 0.81 |
| 251 | <b>Piceatan</b>   | 78.77 | 0.65 |
| 237 | <b>Wortman</b>    | 79.05 | 2.12 |
| 145 | <b>BIX 02184</b>  | 79.20 | 0.23 |
| 173 | <b>AS-25242</b>   | 79.21 | 0.17 |
| 82  | <b>AG-1024</b>    | 79.47 | 1.14 |
| 81  | <b>WZ8040</b>     | 79.95 | 0.74 |
| 24  | <b>Sunitinib</b>  | 80.35 | 0.37 |

|     |                  |        |      |
|-----|------------------|--------|------|
| 259 | <b>Tyrphost</b>  | 80.49  | 0.34 |
| 85  | <b>TSU-68</b>    | 80.57  | 0.08 |
| 153 | <b>Ponatinik</b> | 81.95  | 0.35 |
| 147 | <b>BMS-265</b>   | 83.37  | 0.49 |
| 154 | <b>BIX 0218</b>  | 84.33  | 0.27 |
| 258 | <b>Sotrastal</b> | 89.65  | 0.76 |
| 30  | <b>AG-490</b>    | 96.10  | 0.60 |
| 247 | <b>CH54248</b>   | 109.30 | 1.21 |
| 246 | <b>TG 1007</b>   | 115.33 | 2.59 |
| 260 | <b>Semaxan</b>   | 152.70 | 3.54 |
